# Supplementary material
Source: PubMed Central journal article supplement (PMC2740840)
Supplement: halms409448-supplement_2.pdf [file halms409448-supplement_2.pdf]

**Supplementary Table 1. Polymerase chain reaction primers and conditions**

| Oligonucleotide   | Sequence 5'-3'          | Product size (bp) | Annealing temp (°C) | Cycles |
|-------------------|-------------------------|-------------------|---------------------|--------|
| β-actin forward   | GTGGGGCGCCCCAGGCACCA    | 626 bp            | 56°C                | 25     |
| β-actin reverse   | CTCTTCTCCAGGGAGGAGCT    |                   |                     |        |
| Oct4 forward      | CGACCATCTGCCGCTTTGAG    | 572 bp            | 57°C                | 30     |
| Oct4 reverse      | CCCCCTGTCCCCCATTCTTA    |                   |                     |        |
| Nanog forward     | TACCTCAGCCTCCAGCAGA     | 390 bp            | 57°C                | 28     |
| Nanog reverse     | CCTCCAAGTCACTGGCAG      |                   |                     |        |
| Sox2 forward      | CCCCCGGCGGCAATAGCA      | 447 bp            | 58°C                | 28     |
| Sox2 reverse      | TCGGCGCCGGGGAGATACAT    |                   |                     |        |
| Rex1 forward      | CGCGGTGTGGGCCTTATGTG    | 486 bp            | 54°C                | 27     |
| Rex1 reverse      | TCTCAGGGCAGCTCTATTCTC   |                   |                     |        |
| FGF5 forward      | AGAAGTGAACAAAACAGGGCG   | 294 bp            | 54°C                | 35     |
| FGF5 reverse      | AGTTGGTATTTTTCCGAGGTGC  |                   |                     |        |
| NF68kD forward    | GTTCAAGAGCCGCTTCAC      | 361 bp            | 54°C                | 30     |
| NF68kD reverse    | CACGCTGGTGAAACTGAG      |                   |                     |        |
| Keratin 8 forward | TGAGGTCAAGGCACAGTACG    | 126 bp            | 54°C                | 30     |
| Keratin 8 reverse | TGATGTTCCGGTTCATCTCA    |                   |                     |        |
| Keratin18 forward | CACAGTCTGCTGAGGTTGGA    | 158 bp            | 56°C                | 28     |
| Keratin18 reverse | GAGCTGCTCCATCTGTAGGG    |                   |                     |        |
| Sox1 forward      | AGAACCCCAAGATGCACAAC    | 198 bp            | 54°C                | 30     |
| Sox1 reverse      | GCCAGCGAGTACTTGTCTTT    |                   |                     |        |
| Gata2 forward     | TGGCGCACAACACTACATGGAAC | 300 bp            | 56°C                | 30     |
| Gata2 reverse     | GAGGGGTGCAGTGGCGTCTT    |                   |                     |        |
| HNF3β forward     | CACCACCAGCCCCACAAAATGG  | 314 bp            | 58°C                | 30     |
| HNF3β reverse     | TTCTTCTCCCTTGCGTCTCTGC  |                   |                     |        |
| Nodal forward     | AGAAGCAGATGTCCAGGGTAGC  | 533 bp            | 54°C                | 30     |
| Nodal reverse     | AGAGGCACCCACATTCTTCC    |                   |                     |        |
| AFP forward       | GGGAGCGGCTGACATTATTA    | 205 bp            | 54°C                | 27     |
| AFP reverse       | CACCCTGAGCTTGACACAGA    |                   |                     |        |
| αMHC forward      | AGGATCCTCTCAACGAGACT    | 469 bp            | 54°C                | 34     |
| αMHC reverse      | GTGATCAATGTCCAGAGAGC    |                   |                     |        |
| Tbx20 forward     | AGGTACCGCTACGCCTAC      | 407 bp            | 55°C                | 30     |
| Tbx20 reverse     | GTCAGTGAGCCTGGAGGA      |                   |                     |        |
