# Supplementary material
Source: PubMed Central journal article supplement (PMC2740840)
Supplement: halms409448-supplement_3.pdf [file halms409448-supplement_3.pdf]

Supplementary Table 2. Primary antibodies

| Immunogen                | Antibody   | Name/<br>reference | Supplier                                                                                                                      | Concentration |
|--------------------------|------------|--------------------|-------------------------------------------------------------------------------------------------------------------------------|---------------|
| CD90                     | monoclonal | 5E10               | BD Biosciences, San Diego,<br><a href="http://www.bdbiosciences.com">http://www.bdbiosciences.com</a>                         | 1/100         |
| $\beta$ III tubulin      |            | CBL412             | Chemicon<br><a href="http://www.chemicon.com">http://www.chemicon.com</a>                                                     | 1/200         |
| Desmin                   | monoclonal | CloneD33           | DakoCytomation<br><a href="http://www.dako.fr">http://www.dako.fr</a>                                                         | 1/50          |
| eGFP alexa<br>fluor 488  |            | A21311             | Invitrogen                                                                                                                    | 1/1000        |
| Galactocereb<br>roside C | monoclonal | VMA342             | Abcys                                                                                                                         | 1/100         |
| GATA4                    | polyclonal | C-20/ sc-<br>1237  | Santacruz Biotechnology, Inc.<br><a href="http://scbt.com">http://scbt.com</a><br>a gift from Claire Chazaud ;<br>Inserm U384 | 1/100         |
| GFAP                     | monoclonal | SMI21              | SternbergerMonoclonals Inc.                                                                                                   | 1/1000        |
| GFAP                     | polyclonal |                    | DakoCytomation                                                                                                                | 1/1000        |
| Glucagon                 | monoclonal | Clone<br>K79bB10   | Sigma ; St. Louis,<br><a href="http://www.sigmaaldrich.com">http://www.sigmaaldrich.com</a>                                   | 1/500         |
| HNF3 $\beta$             | polyclonal | M-20 / sc-<br>6554 | DSHB<br>(Developmental Studies<br>Hybridoma Bank, Iowa City, IA,<br><a href="http://www.uiowa.edu">http://www.uiowa.edu</a> ) | 1/500         |
| Human<br>nuclei          | monoclonal | VMA1281            | Abcys<br><a href="http://www.abcysonline.com">http://www.abcysonline.com</a>                                                  | 1/100         |
| Ki67                     |            | MM1                | TEBU                                                                                                                          | 1/200         |
| MAP2                     | monoclonal | M4403              | Sigma                                                                                                                         | 1/800         |
| Nanog                    |            | hNanog.1           | e-bioscience<br><a href="http://www.ebioscience.com">http://www.ebioscience.com</a>                                           | 1/500         |
| Nestin                   | monoclonal | MAB5326            | Chemicon                                                                                                                      | 1/100         |

|          |            |                      |                               |        |
|----------|------------|----------------------|-------------------------------|--------|
| NF165    | monoclonal | 2H3                  | DSHB                          | 1/50   |
| Oct-4    | monoclonal | C-10 /<br>sc5279     | Santa Cruz Biotechnology Inc. | 1/1000 |
| SSEA4    | monoclonal | MC-813               | DSHB                          | 1/100  |
| TRA-1-60 | monoclonal | TRA-1-60/<br>MAB4360 | Chemicon                      | 1/100  |
| TRA-1-81 | monoclonal | TRA-1-81             | DSHB                          | 1/100  |
| BrdU     | monoclonal | PRB-1                | Molecular Probes              | 1/75   |
